# Supplementary material for: Genotypic and phenotypic profiles of EYS gene-related retinitis pigmentosa: a retrospective study
Source: PubMed Central journal article supplement (PMC9748023; doi:10.1038/s41598-022-26017-0), 2022-12-13
Supplement: 41598_2022_26017_MOESM1_ESM.pdf [file 41598_2022_26017_MOESM1_ESM.pdf]

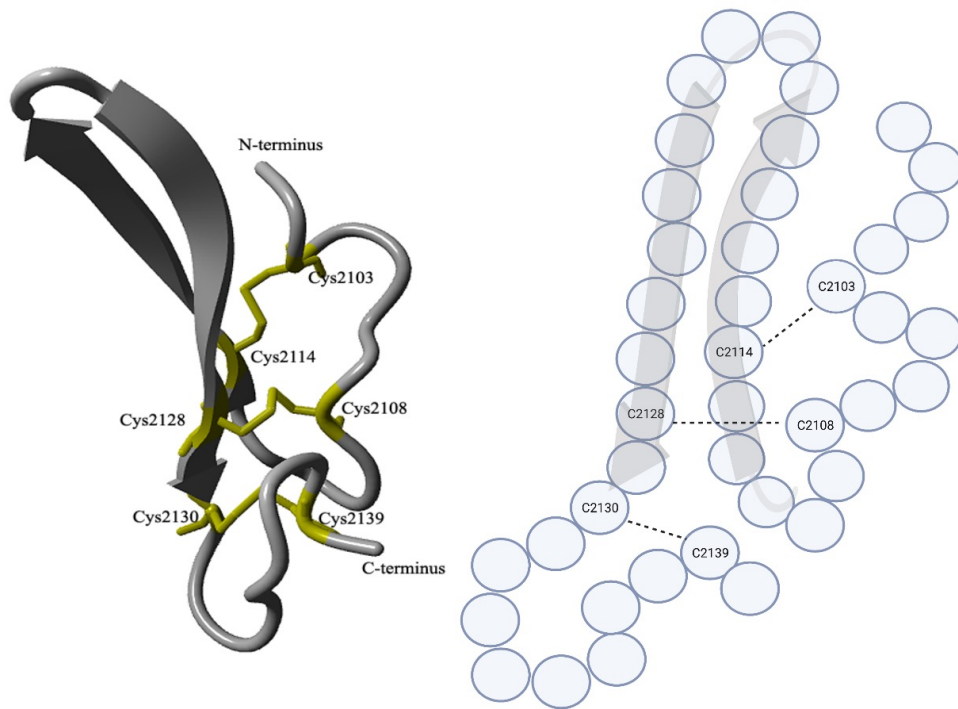

**Supplementary Figure S1.** Schematic representation of the predicted structure of EGF-L21 domain of the EYS gene. The EGF-L21 domain consists of six cysteine residues, which forms paired disulfide bonds under normal conditions. Mutations altering a cysteine residue into another amino acid might result in unpaired cysteine, thus forcing it to bind other residues, resulting in protein misfolding. The 3D structure of the EGF-L21 (left) was predicted by [swissmodel.expasy.com](http://swissmodel.expasy.com) and rendered using YASARA software. The EGF-L21 illustration (right) was created using Biorender.
